# Supplementary material
Source: publisher site journal article supplement (https://www.dovepress.com/article/407116)
Supplement: Supplementary file 1 [file get_supplementary_file.php]

**Supplementary Materials:**

**Fig. S1 Chemoresistance of small cell lung cancer cells.** (A-C)Chemoresistance curves of SCLC cells to DDP (A), ADM (B), and VP-16 (C) were calculated by the relative cell survival rates (%) of the drugs over the no-drug control group. (D) IC50 values ​​of six small cell lung cancer cells against three chemotherapeutic drugs.

**
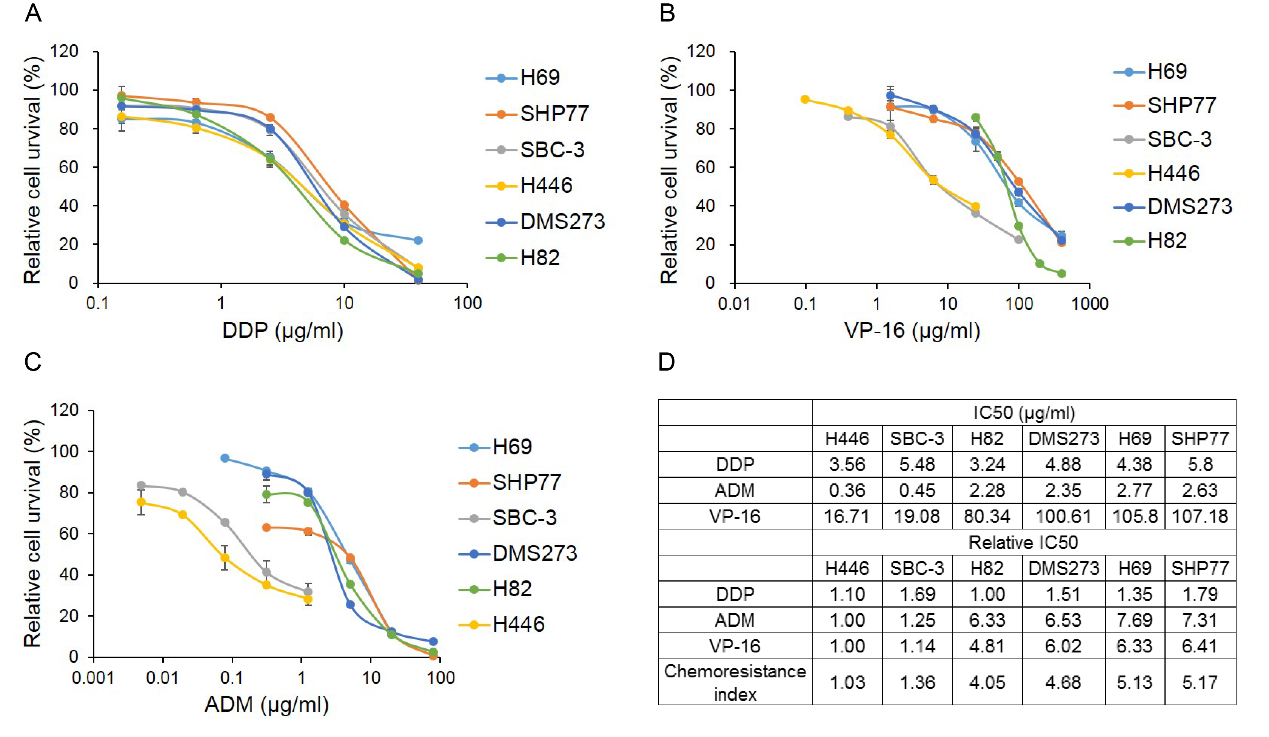
**

**Fig. S2 The expression of YAP1 in SCLC.** (A) Venn diagram showing miR-375-3p-related mRNAs screened by the intersection of TargetScan, PicTar, and mRNA sequence data. (B) The expression levels of SLC7A11 and YAP1 were analyzed after miR-375-3p mimic or inhibitor transfection. (C) The protein expression levels of YAP1 in six SCLC cell lines. (D) Effects of different concentrations of CA3 (YAP1 inhibitor) on the protein expression level of YAP1. (E) Comparison of YAP1 levels in SCLC patients and healthy people. **p<0.01, ns: no significance

**
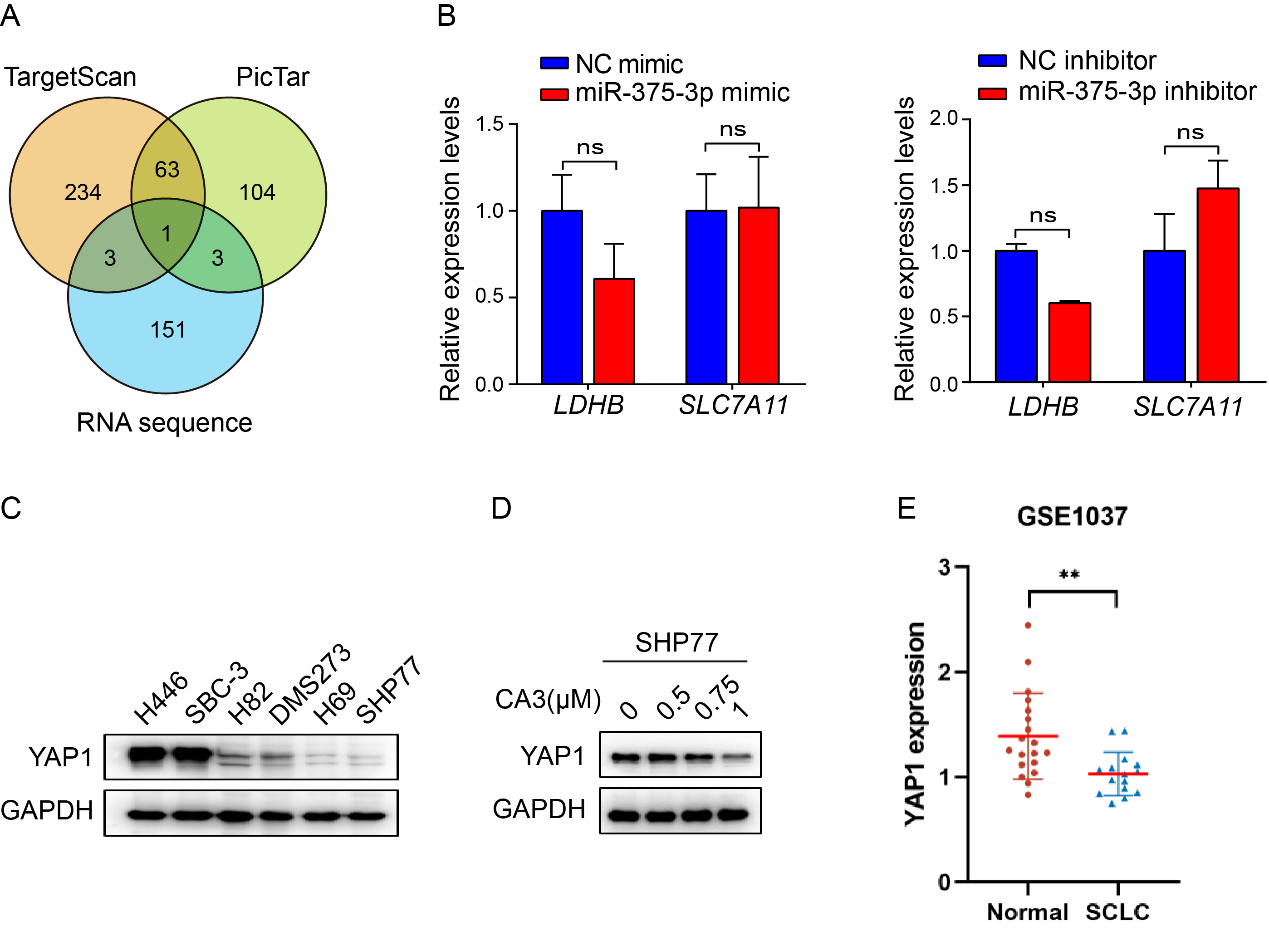
**

**Table. S1 The sequences of primers and siRNAs employed in this research**

| circSH3PXD2A F | GCAGAGAATCCAGCCTGGTG |
| --- | --- |
| circSH3PXD2A R | TCCGAGTTCTCCTGCTTCTTATAGT |
| YAP1 F | TAGCCCTGCGTAGCCAGTTA |
| YAP1 R | TCATGCTTAGTCCACTGTCTGT |
| LDHB F | GATTCTGCTAGATTTCGCTACCTT |
| LDHB R | CACATTCACACCACTCCACACA |
| SCL7A11 F | CCCGTGTGTCCCTACTATGGT |
| SCL7A11 R | CCAATGATGGTGCCAATGATAA |
| GAPDH F | GAACGGGAAGCTCACTGG |
| GAPDH R | GCCTGCTTCACCACCTTCT |
| SH3PXD2A F | GGAGGTGGTGGATGTCAT |
| SH3PXD2A R | GGTGTTGATGTCGGAGTC |
| si-circSH3PXD2A-1 | AGAGAATCCAGCCTGGTGC |
| si-circSH3PXD2A-2 | GAGAATCCAGCCTGGTGCC |
| si-circSH3PXD2A-3 | GAATCCAGCCTGGTGCCGA |

**Table. S2 The diagnostic values of tumor markers and circSH3PXD2A in DDP-resistant SCLC patients**

| Markers | AUC (95% CI) | Sensitivity (%) | Specificity (%) | P value |
| --- | --- | --- | --- | --- |
| CEA | 0.5467(0.3987,0.6946) | 66.70 | 53.30 | 0.5346 |
| CA211 | 0.5044(0.3554,0.6535) | 66.70 | 46.70 | 0.9528 |
| CA125 | 0.5228(0.3749,0.6706) | 60.00 | 46.70 | 0.7618 |
| NSE | 0.5778(0.4315,0.7240) | 50.00 | 53.30 | 0.3007 |
| ProGRP | 0.5577(0.3873,0.7280) | 60.90 | 47.10 | 0.5028 |
| EVs-dervied circSH3PXD2A | 0.7322(0.6040,0.8605) | 90.00 | 60.00 | 0.0020 |
| Serum circSH3PXD2A | 0.5900(0.4451,0.7349) | 73.30 | 46.70 | 0.2311 |
| EVs-derived circSH3PXD2A+NSE | 0.7256(0.5961,0.8551) | 90.00 | 56.70 | 0.0027 |
| EVs-derived circSH3PXD2A +ProGRP | 0.7723(0.6395,0.9051) | 92.00 | 57.70 | 0.0009 |
